# Supplementary material for: Strong thickness-dependent quantum confinement in all-inorganic perovskite Cs2PbI4with a Ruddlesden–Popper structure
Source: Royal Society of Chemistry journal article supplement (doi:10.1039/c9tc02267h), 2019-01-01
Supplement: c9tc02267h1.pdf [file c9tc02267h1.pdf]

## Supplementary Information

### Strong Thickness-Dependent Quantum Confinement in All-inorganic Perovskite Cs<sub>2</sub>PbI<sub>4</sub> with Ruddlesden-Popper Structure

Yu-Feng Ding<sup>1</sup>, Qian-Qi Zhao<sup>1</sup>, Zhuo-Liang Yu<sup>1</sup>, Yu-Qing Zhao<sup>1</sup>, Biao Liu<sup>1</sup>, Peng-Bin He<sup>1</sup>, Hong Zhou<sup>1</sup>, Kenli Li, Shuang-Feng Yin<sup>2</sup>, Meng-Qiu Cai<sup>1,4\*</sup>

*<sup>1</sup>Key Laboratory for Micro/Nano Optoelectronic Devices of Ministry of Education & Hunan Provincial Key Laboratory of Low-Dimensional Structural Physics and Devices, School of Physics and Electronics, Hunan University, Changsha 410082, China*

*<sup>2</sup>College of Chemistry and Chemical Engineering, Hunan University, Changsha, 410082, People's Republic of China*

*<sup>3</sup>The College of Computer Science and Electronic Engineering and National Supercomputing Center in Changsha, Hunan University, Hunan 410082, China*

*<sup>4</sup>Synergetic Innovation Center for Quantum Effects and Applications (SICQEA), Hunan Normal University, Changsha 410081, China*

---

\*The corresponding author, Electronic address: [mqcai@hnu.edu.cn](mailto:mqcai@hnu.edu.cn) (M.Q. Cai)

**Figure S1.** The tested atoms structure without dangling bonds for monolayer perovskite CsPbI<sub>4</sub>.

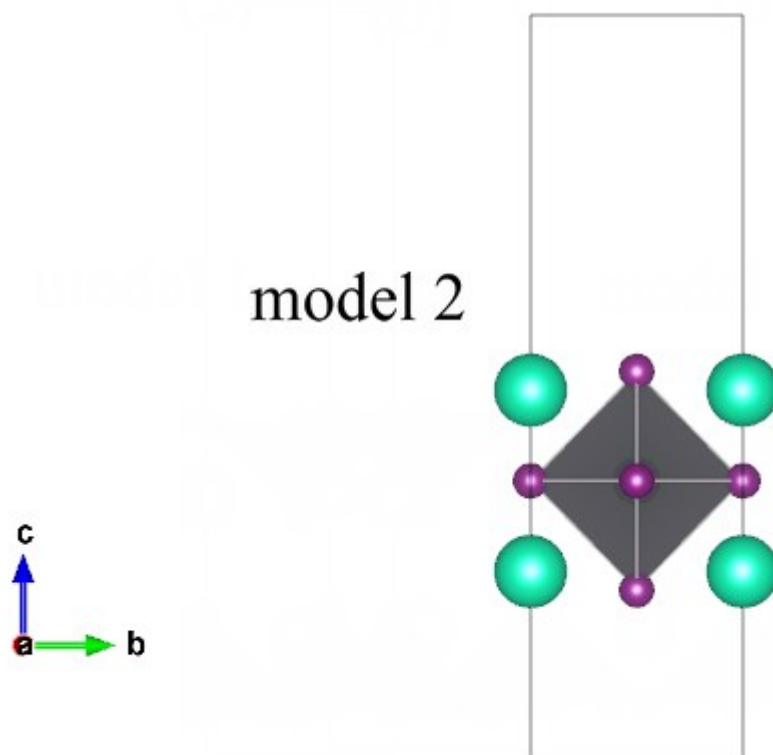

**Figure S2.** The band structure of model in our manuscript with PBE (a) and PBE+SOC (b). The band structure of model 2 without dangling bond with PBE (c) and PBE+SOC (d) for one layer perovskite CsPbI<sub>4</sub>.

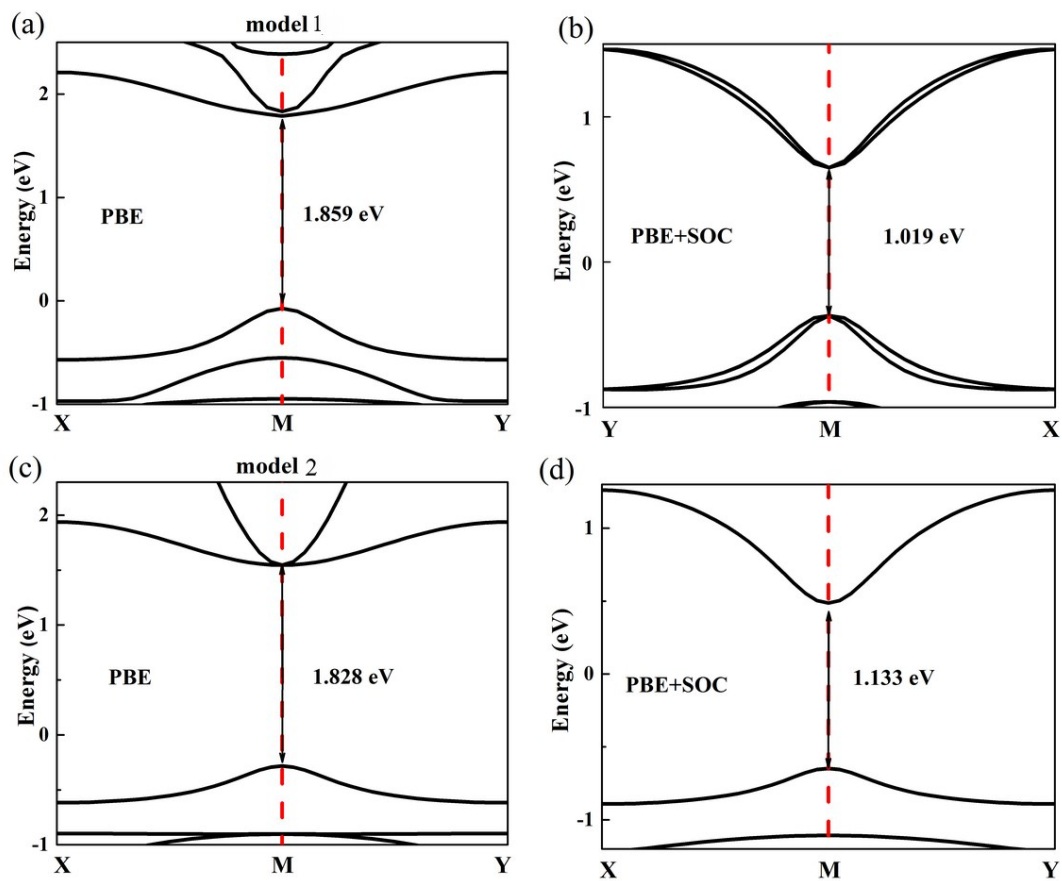

**Figure S3.** The calculated band structures of all-inorganic 2D layered RP perovskite  $\text{Cs}_2\text{PbI}_4$  ( $L=4, 5$ ) by PBE.

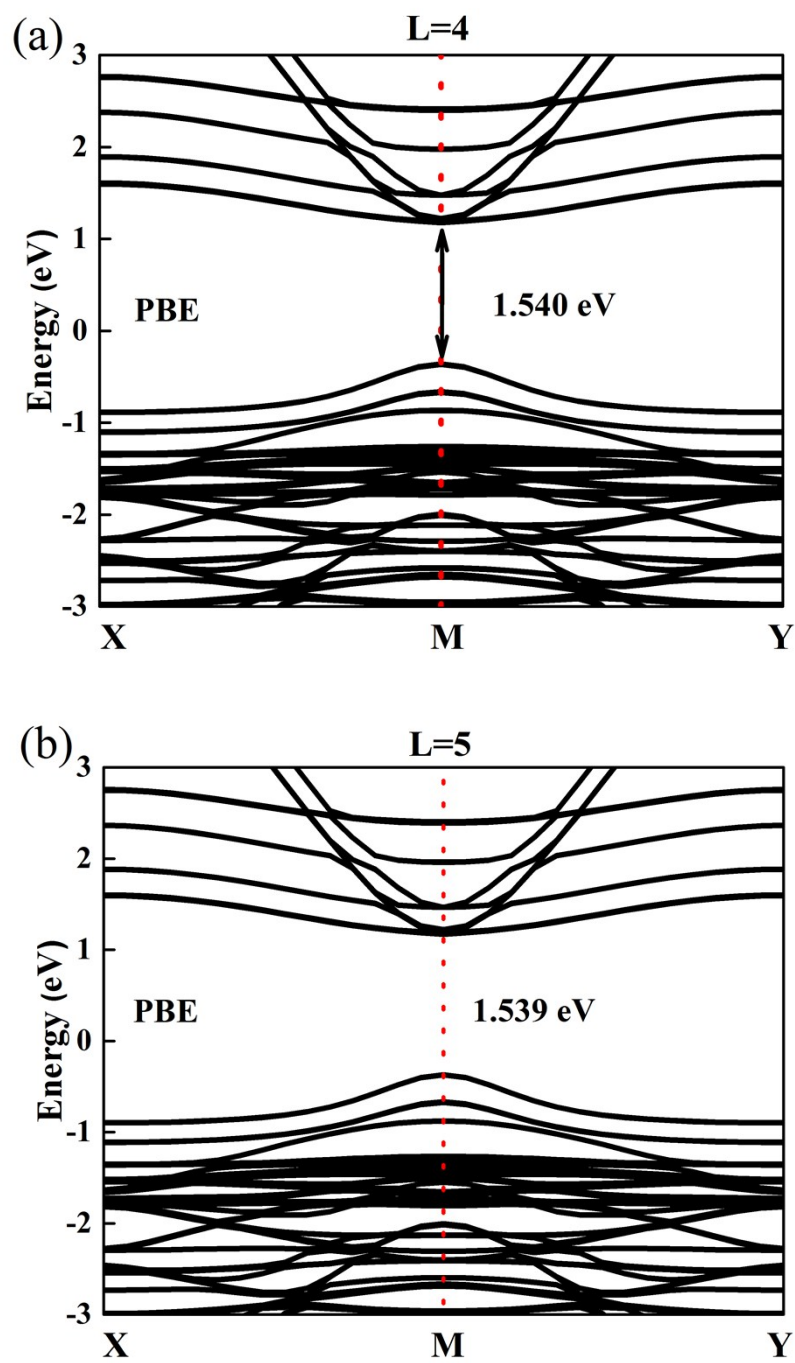

**Figure S4.** The band structures with LDA functionals for one layer (a), two layers (b) and three layers (c). The values of bandgaps are shown in the figure.

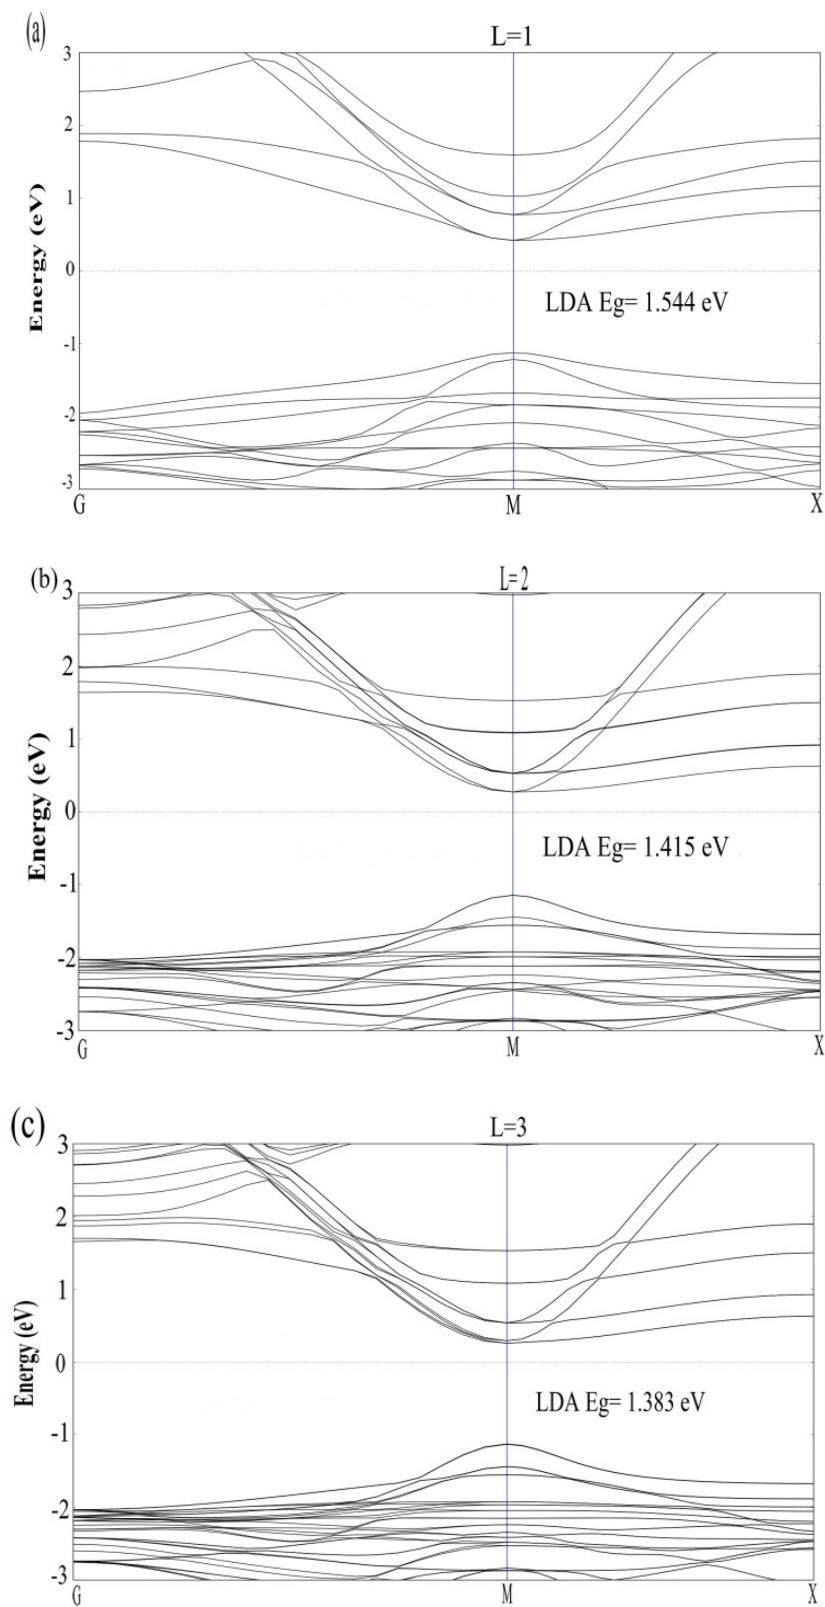

**Figure S5.** (a) The band edge energy shift of VB and CB with respect to the lattice dilation along the  $a_0$  direction for the bilayer perovskite. Solid lines represent the linear fit, which defines DP constants. (b) The total energy as a function of lattice deformation along the  $a_0$  directions. Solid lines are the parabola fittings, which give elastic constant.  $I_0$  is the lattice constant in the transport direction, and  $\Delta I = I - I_0$  is the deformation of  $I_0$ .

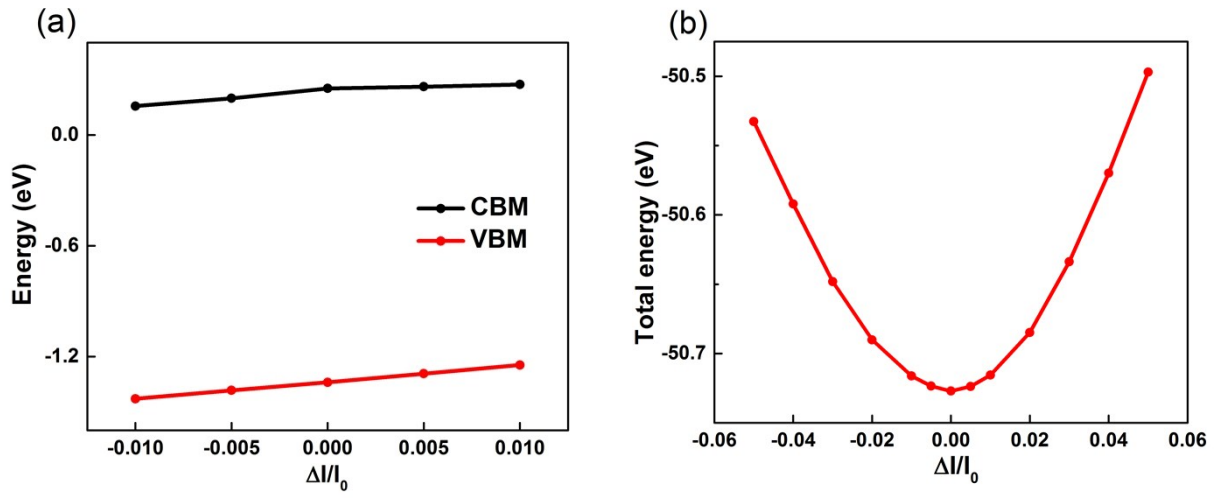

**Figure S6.** (a) The band edge positions of VB and CB with respect to the lattice dilation along the  $a_0$  direction for the trilayer perovskite. Solid lines represent the linear fit, which defines DP constants. (b) The total energy as a function of lattice deformation along the  $a_0$  direction. Solid lines are the parabola fittings, which give elastic constant.

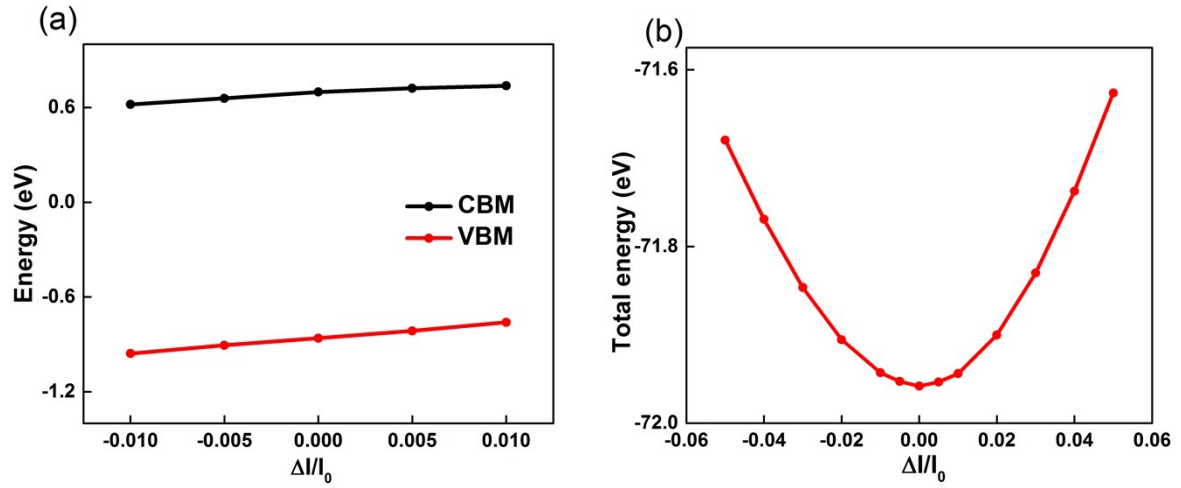

**Table S1.** The bandgap values of perovskite  $\text{Cs}_2\text{PbI}_4$  with different thicknesses calculated by PBE, PBE+SOC, LDA and HSE+SOC.

---

| Layer | PBE (eV) | PBE+SOC<br>(eV) | LDA (eV) | HSE+SOC<br>(eV) |
|-------|----------|-----------------|----------|-----------------|
| 1L    | 1.859    | 1.019           | 1.544    | 1.544           |
| 2L    | 1.592    | 0.823           | 1.415    | 1.333           |
| 3L    | 1.558    | 0.804           | 1.383    | 1.310           |
| 4L    | 1.540    |                 |          |                 |
| 5L    | 1.539    |                 |          |                 |

---
